# Supplementary material for: From Venom to Vein: Factor VII Activation as a Major Pathophysiological Target for Procoagulant Australian Elapid Snake Venoms
Source: MDPI journal article supplement (doi:10.3390/toxins16100430), 2024-10-06
Supplement: s1 [file s1]

## Sheet: Figure 1
	Pseudonaja affinis			Pseudonaja ingrami			Pseudonaja inframacula			Pseudonaja aspidorhyncha			Pseudonaja mengdeni			Pseudonaja nuchalis			Pseudonaja textilis (Alice Springs)			Pseudonaja textilis (Redbank)			Pseudonaja textilis (Canungra)			Pseudonaja textilis (Barossa)			Oxyuranus microlepidotus			Oxyuranus scutellatus			Hoplocephalus stephensii			Hoplocephalus bitorquatus			Hoplocephalus bungaroides			Notechis scutatus			Tropidechis carinatus
Clotting time	7.3	7.5	7.4	5.7	5.7	5.5	7.2	7.3	7.4	6.6	6.5	6.5	5.9	5.8	6.1	5.9	5.9	6.1	6	5.7	6.5	5.4	5.4	5.5	6.1	6	6.3	5.9	6	6	10.7	10.7	11.1	7.7	7.8	7.7	20.7	20.9	21	25.1	25.5	25.7	21.2	22.2	23.2	11	11.1	11.1	10
FII activation % relative to control enzyme	17.429	17.3457	17.2639	16.2727	16.2997	16.3261	25.0575	25.0324	25.0078	23.859	23.747	23.637	24.0286	24.1668	24.3024	28.5117	28.4611	28.4115	15.5466	15.6338	15.7189	9.66797	9.70348	9.73814	18.281	18.2567	18.233	16.4428	16.5612	16.6768	5.32359	5.40643	5.48877	15.5584	15.6988	15.8368	7.84195	7.89169	7.86832	5.32752	5.42926	5.47936	13.2266	13.3249	13.2995	4.75532	4.79379	4.78769	7.31526
FVII activation % relative to control enzyme	25.22	25.17	25.12	47.3121	47.1492	46.9889	22.1496	22.4944	22.8338	53.833	53.8085	53.7843	54.3853	54.4989	54.6107	55.8377	55.8129	55.7886	39.859	39.7327	39.6084	30.521	30.4232	30.3268	38.1429	38.0401	37.9389	29.3908	29.2205	29.0529	17.13	17.06	16.91	31.27	31.14	30.87	21.124	20.9826	20.8434	17.4307	17.3562	17.2829	23.4378	23.2884	23.1413	17.247	17.1439	17.0425	23.9219
[truncated: 26 more columns]

## Sheet: Figure 2
	Pseudonaja affinis			Pseudonaja ingrami			Pseudonaja inframacula			Pseudonaja aspidorhyncha			Pseudonaja mengdeni			Pseudonaja nuchalis			Pseudonaja textilis (Alice Springs)			Pseudonaja textilis (Redbank)			Pseudonaja textilis (Canungra)			Pseudonaja textilis (Barossa)			Oxyuranus microlepidotus			Oxyuranus scutellatus			Hoplocephalus stephensii			Hoplocephalus bitorquatus			Hoplocephalus bungaroides			Notechis scutatus			Tropidechis carinatus
FII activation % relative to control enzyme	17.429	17.3457	17.2639	16.2727	16.2997	16.3261	25.0575	25.0324	25.0078	23.859	23.747	23.637	24.0286	24.1668	24.3024	28.5117	28.4611	28.4115	15.5466	15.6338	15.7189	9.66797	9.70348	9.73814	18.281	18.2567	18.233	16.4428	16.5612	16.6768	5.32359	5.40643	5.48877	15.5584	15.6988	15.8368	7.84195	7.89169	7.86832	5.32752	5.42926	5.47936	13.2266	13.3249	13.2995	4.75532	4.79379	4.78769	7.31526
FVII activation % relative to control enzyme	25.22	25.17	25.12	47.3121	47.1492	46.9889	22.1496	22.4944	22.8338	53.833	53.8085	53.7843	54.3853	54.4989	54.6107	55.8377	55.8129	55.7886	39.859	39.7327	39.6084	30.521	30.4232	30.3268	38.1429	38.0401	37.9389	29.3908	29.2205	29.0529	17.13	17.06	16.91	31.27	31.14	30.87	21.124	20.9826	20.8434	17.4307	17.3562	17.2829	23.4378	23.2884	23.1413	17.247	17.1439	17.0425	23.9219
[truncated: 26 more columns]

## Sheet: Figure 3
		FII			FVII
Cryptophis nigrescens		0.130938	0.134516	0.136749	0.377559	0.374971	0.372424
Demansia papuensis		9.3655e-05	0.00011032	0.00012608	0.077762	0.0801637	0.0825263
Demansia psammophis		4.0455e-05	5.5376e-05	6.9945e-05	0.311547	0.310166	0.308807
Hemiaspis damelli		0.0461184	0.0462884	0.0460325	0.330213	0.329554	0.3289
Hemiaspis signata		0.117948	0.118634	0.118221	0.383816	0.38056	0.37736
Hoplocephalus bitorquatus		0.095411	0.0972329	0.0981303	0.312167	0.310834	0.309521
Hoplocephalus bungaroides		0.236875	0.238637	0.238182	0.419748	0.417073	0.414439
Hoplocephalus stephensii		0.140442	0.141333	0.140914	0.378311	0.375778	0.373285
Notechis scutatus		0.0851633	0.0858523	0.0857431	0.308878	0.307032	0.305214
Oxyuranus microlepidotus		0.0953405	0.096824	0.0982988	0.306782	0.305529	0.302842
Oxyuranus scutellatus		0.278636	0.28115	0.283622	0.560016	0.557688	0.552853
Paroplocephalus atriceps		0.0678789	0.0703584	0.0721526	0.31687	0.314318	0.311809
Pseudechis porphyriacus		0.0331495	0.0341086	0.0347365	0.418914	0.416177	0.413483
Pseudonaja affinis		0.312138	0.310645	0.30918	0.451667	0.450771	0.449876
Pseudonaja aspidorhyncha		0.427292	0.425286	0.423317	0.964099	0.963659	0.963226
Pseudonaja inframacula		0.448756	0.448307	0.447866	0.396679	0.402854	0.408933
Pseudonaja ingrami		0.291428	0.291912	0.292384	0.847314	0.844398	0.841528
Pseudonaja mengdeni		0.430329	0.432805	0.435233	0.973989	0.976024	0.978027
Pseudonaja nuchalis		0.510618	0.509712	0.508823	1	0.999557	0.999121
Pseudonaja textilis (Alice Springs)		0.278425	0.279987	0.281512	0.713838	0.711576	0.70935
Pseudonaja textilis (Canungra)		0.327396	0.326961	0.326536	0.683103	0.681262	0.67945
Pseudonaja textilis (Barossa)		0.294474	0.296595	0.298665	0.526361	0.523312	0.52031
Pseudonaja textilis (Redbank)		0.173144	0.17378	0.174401	0.546603	0.54485	0.543125
Suta punctata		0.0341785	0.0351792	0.0358414	0.175973	0.177546	0.179086
Tropidechis carinatus		0.13101	0.131659	0.131093	0.428419	0.424942	0.421524
